# Supplementary material
Source: PubMed Central journal article supplement (PMC5533232)
Supplement: ASN.2016080902SupplementaryData.pdf [file ASN.2016080902SupplementaryData.pdf]

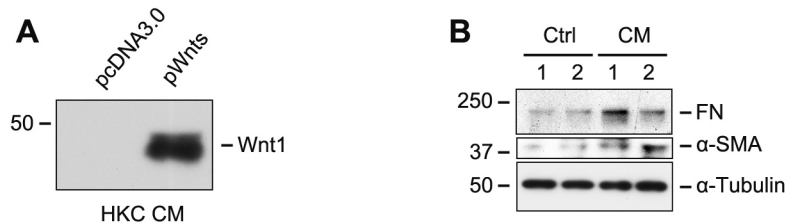

**Supplementary Figure 1.** Wnts also induce tubular cell injury by an autocrine mechanism. (A) Preparation of tubular cell conditioned medium rich in Wnts ligands. Human kidney proximal tubular cells (HKC-8) were transfected with either empty vector (pCDNA3.0) or Wnts expression vectors. Conditioned media were collected after incubation for 48 hours. Western blotting revealed the presence of Wnt1 protein in the conditioned medium. (B) Tubular cell conditioned medium (CM) promoted fibronectin and  $\alpha$ -SMA expression in HKC-8 cells. HKC-8 cells were incubated with conditioned medium enriched in Wnt1 for 48 hours, and cell lysates were analyzed by Western blotting using antibodies against fibronectin,  $\alpha$ -SMA and  $\alpha$ -tubulin, respectively.

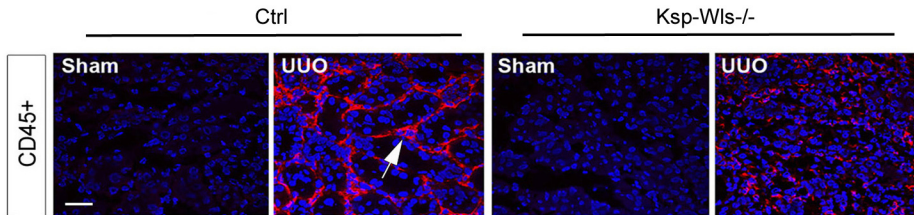

**Supplementary Figure 2.** Tubule-specific deletion of Wls represses renal inflammation. Representative immunofluorescence micrographs show CD45-positive cells in the control and Ksp-Wls<sup>-/-</sup> kidneys at 7 days after UUO. Arrow indicates positive cells. Scale bar, 50  $\mu$ m.

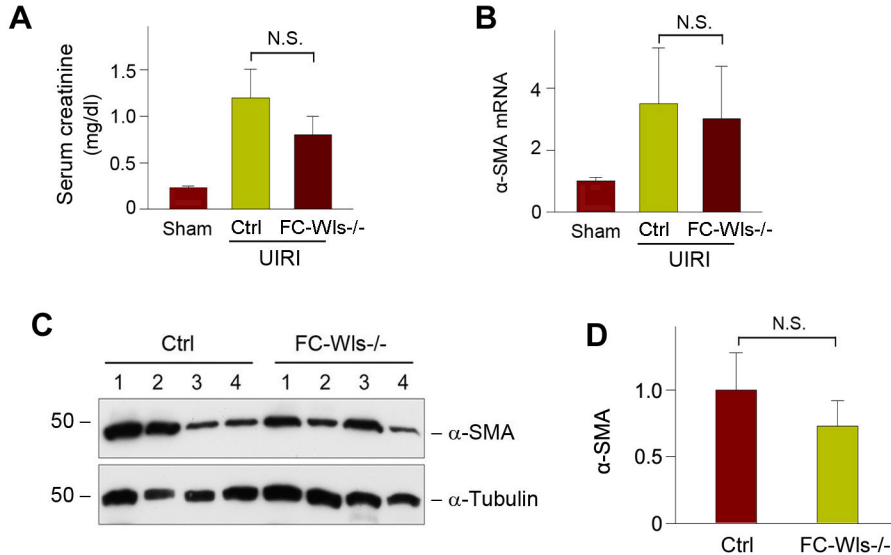

**Supplementary Figure 3.** Fibroblast-specific deletion of Wls exhibits little effects on kidney fibrosis after IRI. (A) Serum creatinine level in control and FC-Wls<sup>-/-</sup> mice at 10 days after UIRI (n = 5). (B) qRT-PCR analyses show renal  $\alpha$ -SMA mRNA expression in control and FC-Wls<sup>-/-</sup> mice at 10 days after UIRI (n = 5). N.S., not significant. (C) Western blot analyses demonstrate that renal  $\alpha$ -SMA protein levels in control and FC-Wls<sup>-/-</sup> mice at 10 days after UIRI. (D) Quantitative data of renal  $\alpha$ -SMA protein in control and FC-Wls<sup>-/-</sup> mice at 10 days after UIRI. N.S., not significant

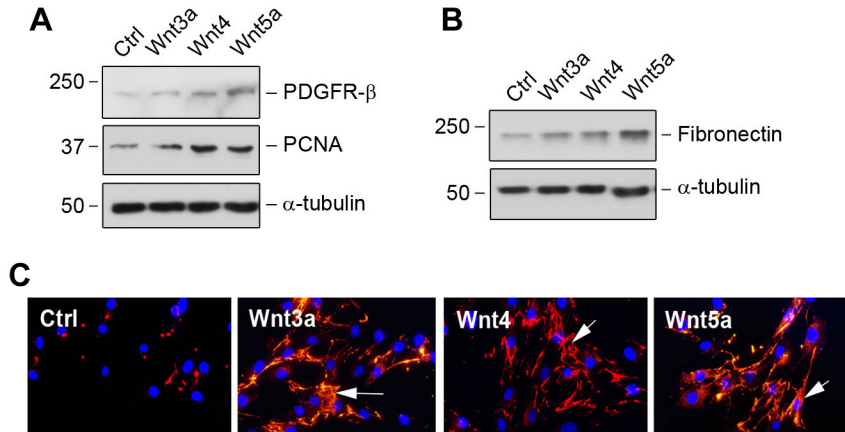

**Supplementary Figure 4.** Wnt ligands promote fibroblast activation and matrix production *in vitro*. (A, B) Western blot analyses demonstrate that recombinant Wnt3a, Wnt4 and Wnt5a induced PDGFR- $\beta$  and PCNA (A) as well as fibronectin (B) expression in NRK-49F fibroblasts after incubation for 48 hours. (C) Representative micrographs show that Wnt3a, Wnt4 and Wnt5a induced fibronectin expression and deposition. NRK-49F cells were incubated with different Wnts for 48 hours, and fibronectin expression was assessed by immunofluorescence staining.

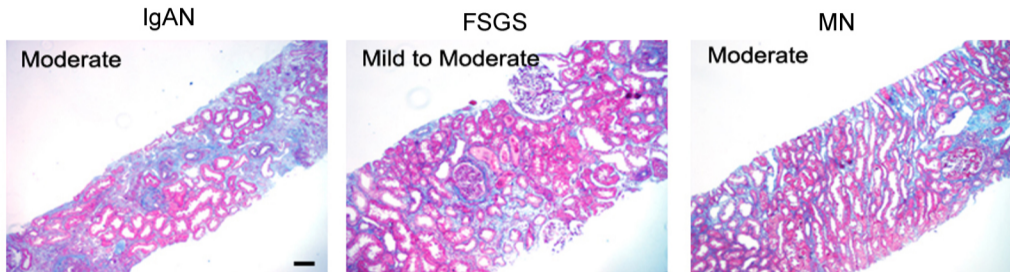

**Supplementary Figure 5.** Representative micrographs of human kidney biopsy specimens from IgAN, FSGS and MN patients. Masson trichrome staining revealed renal interstitial fibrosis in varying degree in these patients. Scale bar, 50 μm. IgAN, IgA nephropathy; FSGS, focal and segmental glomerulosclerosis; MN, membranous nephropathy.

**Supplementary Table 1. Demographic Characteristics of the Participants Included in the Wnts staining**

| <b>IgA Nephropathy</b>        |     |             |              |              |              |           |          |                                                                            |                                                             |                 |
|-------------------------------|-----|-------------|--------------|--------------|--------------|-----------|----------|----------------------------------------------------------------------------|-------------------------------------------------------------|-----------------|
| ID No.                        | Sex | Age (years) | BUN (mmol/l) | Scr (μmol/l) | 24h UPro (g) | ALB (g/l) | Hb (g/l) | Pathologic description                                                     |                                                             | Final diagnosis |
|                               |     |             |              |              |              |           |          | Glomeruli                                                                  | Tubule-Interstitium                                         |                 |
| 2015337                       | M   | 48          | 7.0          | 123.8        | 1.2          | -         | 159      | 10 gloms (8 global sclerosis)                                              | Moderate to severe tubule atrophy and interstitial fibrosis | Hass V          |
| 2015338                       | M   | 24          | 9.42         | 167.0        | -            | 42.7      | 140      | 54 gloms (18 global, 5 segmental sclerosis, 5 fibrotic-cellular crescents) | Moderate to severe tubule atrophy and interstitial fibrosis | Hass III        |
| 2015344                       | F   | 66          | 8.3          | 85.0         | 0.96         | 41.8      | 119      | 11 gloms (5 global sclerosis)                                              | Mild to moderate tubule atrophy and interstitial fibrosis   | Hass III        |
| 2015345                       | F   | 47          | 5.31         | 113.9        | 3.18         | 37.1      | 113.7    | 9 gloms (1 global sclerosis, 4 fibrotic crescents)                         | Moderate tubule atrophy and interstitial fibrosis           | Hass IV         |
| 2015586                       | M   | 38          | 4.72         | 64.0         | ++           | 38.8      | 161      | 27 gloms (2 global sclerosis, 2 fibrotic crescents)                        | Mild to moderate tubule atrophy and interstitial fibrosis   | Hass III        |
| <b>Membranous Nephropathy</b> |     |             |              |              |              |           |          |                                                                            |                                                             |                 |
| 2015381                       | M   | 55          | 4.18         | 77.0         | +++          | 26        | 138      | 28 gloms (5 global sclerosis)                                              | Moderate tubule atrophy and interstitial fibrosis           | MN              |
| 2015383                       | F   | 55          | 14.7         | 90.0         | 4.098        | 20        | 123      | 62 gloms (2 global sclerosis)                                              | Mild tubule atrophy and interstitial fibrosis               | MN              |
| 2015395                       | M   | 52          | 6.9          | 87.0         | 2.827        | 22        | 136      | 10 gloms (mild glomerular basement membrane thickening)                    | Mild interstitial fibrosis                                  | MN              |
| 2015411                       | M   | 39          | -            | -            | 7.236        | 13        | -        | 12 gloms (mild glomerular basement membrane thickening)                    | Mild interstitial fibrosis                                  | MN              |
| 2015584                       | F   | 58          | 3.1          | 61.0         | 3.668        | -         | 114      | 7 gloms (mild glomerular basement membrane thickening)                     | Mild interstitial fibrosis                                  | MN              |

| Focal segmental glomerulosclerosis (FSGS) |   |    |      |       |       |      |     |                                                                                                                  |                                                           |                         |
|-------------------------------------------|---|----|------|-------|-------|------|-----|------------------------------------------------------------------------------------------------------------------|-----------------------------------------------------------|-------------------------|
| 2015450                                   | M | 19 | 5.99 | 105.0 | 1.872 | 43.2 | 128 | 10 gloms (2 global, 2 segmental sclerosis, 2 fibrotic crescents )                                                | Mild to moderate tubule atrophy and interstitial fibrosis | Perihilar Variant       |
| 2015516                                   | M | 68 | 6.89 | 100.0 | 1.55  | 38.7 | 138 | 40 gloms (2 global, 2 segmental sclerosis and hyalinization)                                                     | Mild to moderate tubule atrophy and interstitial fibrosis | Perihilar Variant       |
| 2015531                                   | M | 51 | 5.58 | 82.0  | 3.02  | 41.5 | 150 | 13 gloms (3 global, 3 segmental sclerosis and 1 fibrotic crescent)                                               | Moderate tubule atrophy and interstitial fibrosis         | Perihilar Variant       |
| 2015572                                   | M | 22 | 6.33 | 103.0 | 4.28  | 20.3 | 165 | 13 gloms (Intra-capillary stenosis in 2 gloms urinary pole, endothelium and podocytes segmentally proliferated ) | Mild interstitial fibrosis                                | Tip Variant             |
| 2015590                                   | F | 57 | 8.61 | 117.0 | 8.86  | 33.2 | 115 | 17 gloms (9 global, 2 segmental sclerosis)                                                                       | Moderate tubule atrophy and interstitial fibrosis         | Not Otherwise Specified |

**Abbreviations:** BUN: blood urea nitrogen, Scr: serum creatinine, 24h UPro: 24 hours urinary protein, ALB: albumin, Hb: hemoglobin.

**Supplementary Table 2. Nucleotide sequences of the primers used for RT-PCR**

| <b>Mouse</b>   | <b>Primer Sequence 5' to 3'</b> |                       |
|----------------|---------------------------------|-----------------------|
|                | <b>Forward</b>                  | <b>Reverse</b>        |
| MMP7           | TAGGCGGATGCTCACTTTT             | TTCTGAATGCCTGCAATGTC  |
| Collagen I     | ATCTCCTGGTGCTGATGGAC            | ACCTTGTTTGCCAGGTTTAC  |
| Collagen III   | AGGCAACAGTGGTTCTCCTG            | GAACCTCGTGCTCCAGTTAGC |
| $\alpha$ -SMA  | GAGGCACCACTGAACCCTAA            | CATCTCCAGAGTCCAGCACA  |
| FN             | CGAGGTGACAGAGACCACAA            | CTGGAGTCAAGCCAGACACA  |
| FSP-1          | AGCTACTGACCAGGGAGCTG            | TCATTGTCCCTGTTGCTGTC  |
| PAI-1          | TGGAAAGAGCCAGATTTATCAT          | GAAGTAGAGGGCATTACCAG  |
| $\beta$ -actin | CAGCTGAGAGGGAAATCGTG            | CGTTGCCAATAGTGATGACC  |
